# Supplementary material for: Effect of Urolithin A Supplementation on Muscle Endurance and Mitochondrial Health in Older Adults: A Randomized Clinical Trial
Source: PubMed Central journal article supplement — JAMA Netw Open. 2022 Jan 20;5(1):e2144279. doi: 10.1001/jamanetworkopen.2021.44279 (PMC8777576; doi:10.1001/jamanetworkopen.2021.44279), 2022-01-20
Supplement: jamanetwopen-e2144279-s002.pdf [file jamanetwopen-e2144279-s002.pdf]

## Supplementary Online Content

Liu S, D'Amico D, Shankland E, et al. Effect of urolithin A supplementation on muscle endurance and mitochondrial health in older adults: a randomized clinical trial. *JAMA Netw Open*. 2022;5(1):e2144279. doi:10.1001/jamanetworkopen.2021.44279

**eTable.** No Impact on Muscle Size During the Study Intervention Period

**eFigure 1.** Change in TA ATPmax

**eFigure 2.** Percent Change in Number of Muscle Contractions in Skeletal Muscle

**eFigure 3.** UA Bioavailability in the Study Population

**eFigure 4.** UA Impact on Plasma Acylcarnitine and Ceramide Levels

This supplementary material has been provided by the authors to give readers additional information about their work.

**eTable.** No Impact on Muscle Size During the Study Intervention Period

| <b>Muscle CSA</b>                     | <b>Group</b> | <b>BL</b> | <b>4M</b> | <b>%Δ4M-BL</b> |
|---------------------------------------|--------------|-----------|-----------|----------------|
| <b>TA</b><br><b>(cm<sup>2</sup>)</b>  | Placebo      | 10.5±2.1  | 10.4±2.5  | -1.1±9.7       |
|                                       | UA           | 9.8±1.97  | 9.4±1.7   | -1.6±6.7       |
| <b>FDI</b><br><b>(cm<sup>2</sup>)</b> | Placebo      | 2.3±0.5   | 2.2±0.5   | -4.0±9.3       |
|                                       | UA           | 2.1±0.5   | 2.1±0.5   | 0.28±8.8       |

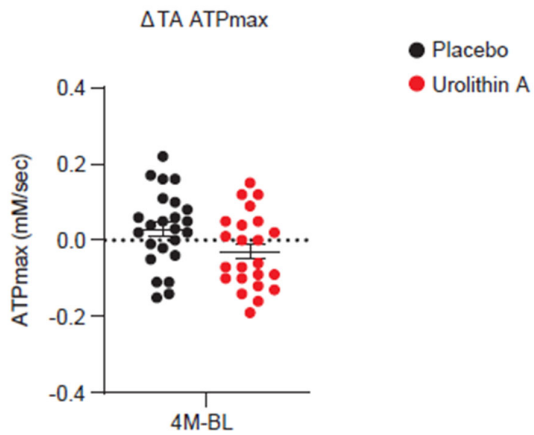

**eFigure 1.** Change in TA ATPmax

Mitochondrial capacity ( $ATP_{max}$ ) in the TA. Changes of  $ATP_{max}$  in absolute value after 4-month supplementation from baseline are shown. The analysis was done using an analysis of co-variance (ANCOVA) with 95% confidence intervals for treatment differences.

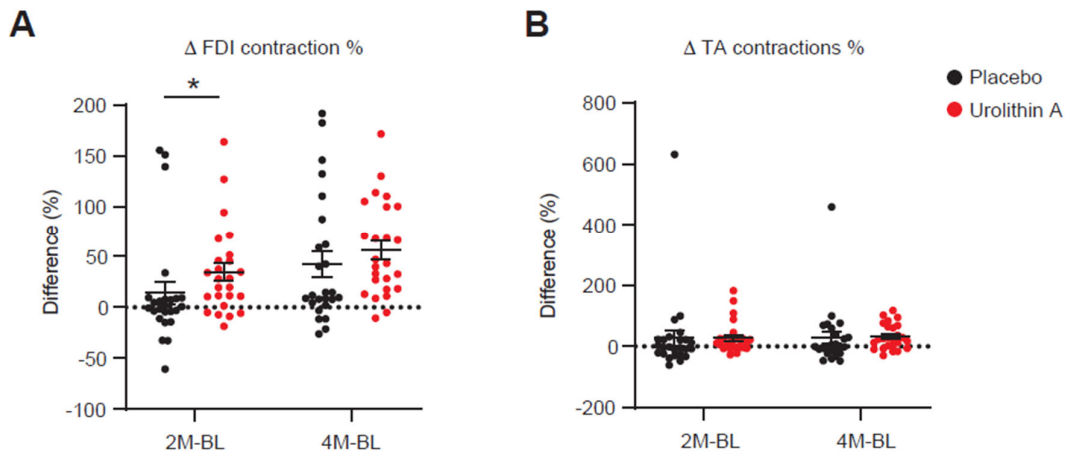

**eFigure 2.** Percent Change in Number of Muscle Contractions in Skeletal Muscle

Change in muscle endurance (number of muscle contractions in hand (FDI) (A) and leg (TA) (B) skeletal muscles from baseline at 2-months and 4-months following intervention depicted as % change. \* $p < 0.05$  after an analysis of co-variance (ANCOVA) with 95% confidence intervals for treatment differences and corresponding non-adjusted p-values depicted.

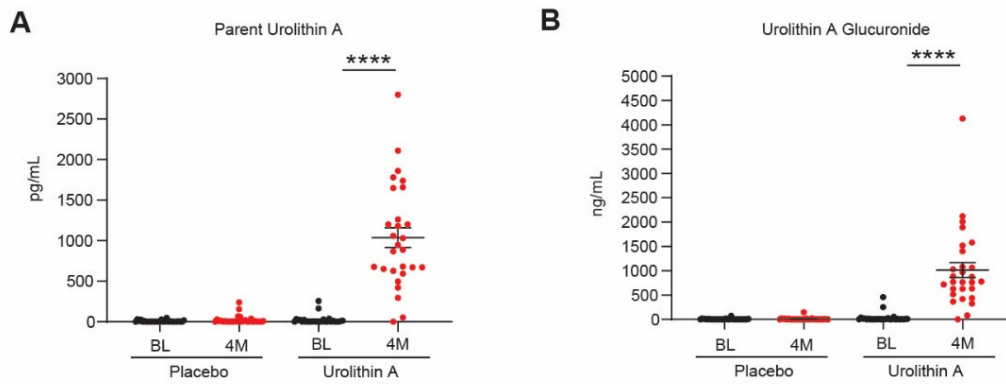

**eFigure 3.** UA Bioavailability in the Study Population

UA (A) and UA-glucuronide (B) plasma levels comparing baseline to the last day of the 4-month treatment period for Placebo and UA 1000 mg (n = 27, Placebo; n = 25, UA 1000 mg). Data represent mean  $\pm$  s.e.m. \*\*\*\*p < 0.0001 after paired t-test.

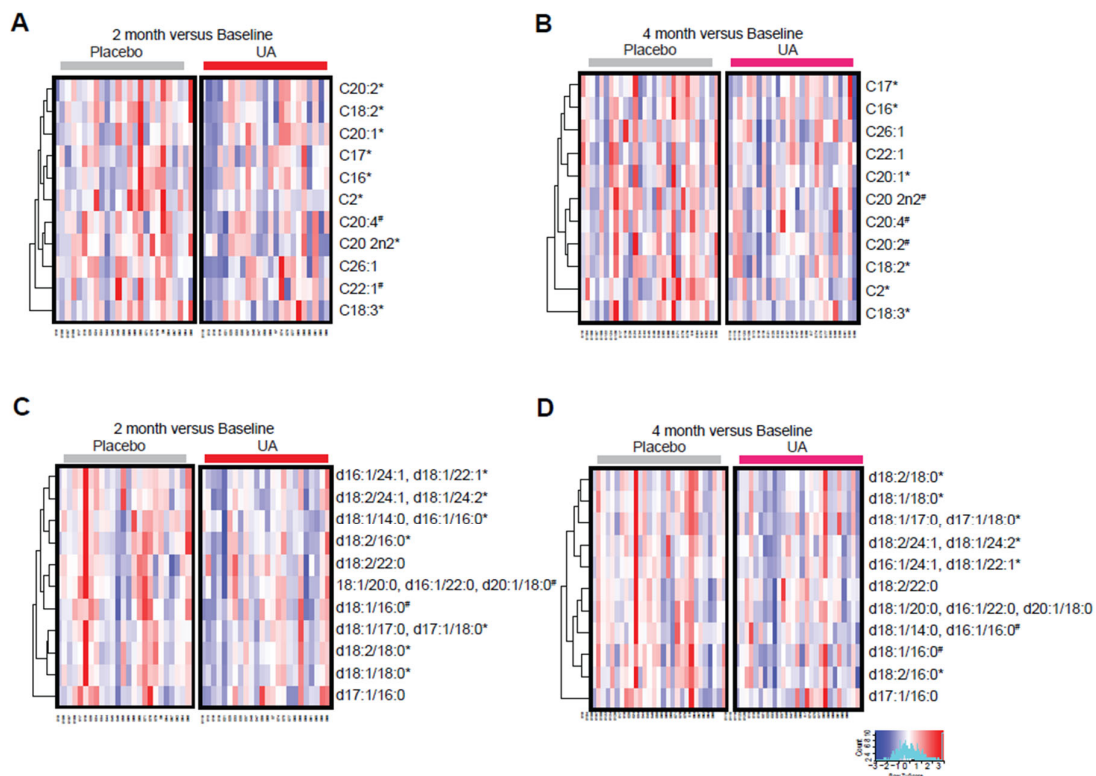

**Figure 4.** UA Impact on Plasma Acylcarnitine and Ceramide Levels

**A, B,** Heatmaps representing the plasma levels of selected acylcarnitines for the indicated groups, comparing the 2-month time-point versus baseline (A) and the 4-month time-point versus baseline (B). **C, D,** Heatmaps representing the plasma levels of selected ceramides for the indicated groups, comparing the 2-month time-point versus baseline (C) and the 4-month time-point versus baseline (D). Values are expressed as Z-scores. #0.05 < P < 0.10; \*p < 0.05; after a two-way, repeated-measures ANOVA.
