# Supplementary material for: Effect of Urolithin A Supplementation on Muscle Endurance and Mitochondrial Health in Older Adults: A Randomized Clinical Trial
Source: PubMed Central journal article supplement — JAMA Netw Open. 2022 Jan 20;5(1):e2144279. doi: 10.1001/jamanetworkopen.2021.44279 (PMC8777576; doi:10.1001/jamanetworkopen.2021.44279), 2022-01-20
Supplement: jamanetwopen-e2144279-s003.pdf [file jamanetwopen-e2144279-s003.pdf]

## Data Sharing Statement

Liu. Effect of Urolithin A Supplementation on Muscle Endurance and Mitochondrial Health in Older Adults. *JAMA Netw Open*. Published January 20, 2022.

doi:10.1001/jamanetworkopen.2021.44279

### Data

**Data available:** Yes

**Data types:** Deidentified participant data

**How to access data:** data available on request to corresponding authors: [dmarc@uw.edu](mailto:dmarc@uw.edu)  
[asingh@amazentis.com](mailto:asingh@amazentis.com)

**When available:** With publication

### Supporting Documents

**Document types:** None

### Additional Information

**Who can access the data:** researchers whose proposed use of the data has been approved

**Types of analyses:** research purposes

**Mechanisms of data availability:** after approval
